# Supplementary material for: Streptococcal autolysin promotes dysfunction of swine tracheal epithelium by interacting with vimentin
Source: PubMed Central journal article supplement (PMC9377611; doi:10.1371/journal.ppat.1010765), 2022-08-03

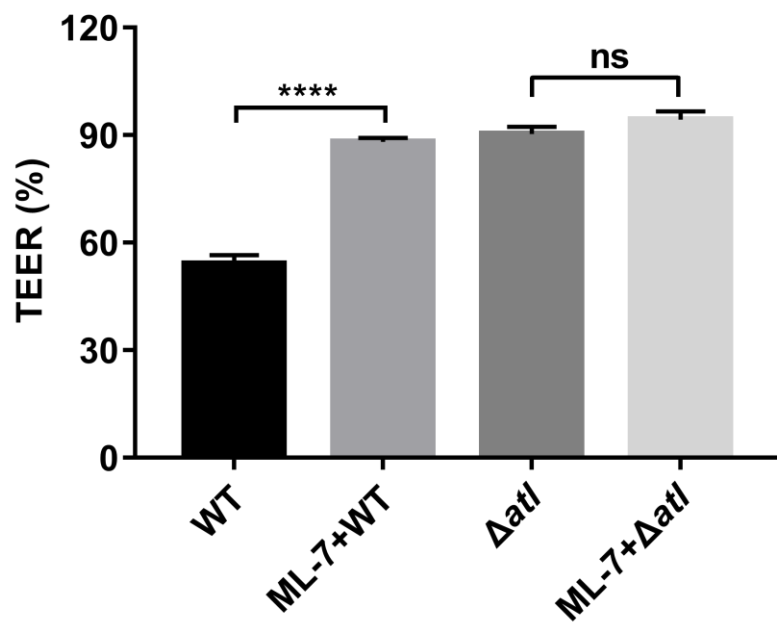

Supplement: ppat.1010765.s009.pdf [file ppat.1010765.s009.pdf]
