# Supplementary material for: Streptococcal autolysin promotes dysfunction of swine tracheal epithelium by interacting with vimentin
Source: PLoS Pathog. 2022 Aug 3;18(8):e1010765. doi: 10.1371/journal.ppat.1010765 (PMC9377611; doi:10.1371/journal.ppat.1010765)

1 10 20 30 40  
*Streptococcus pyogenes* WP\_197035351.1 .....DQA**GTFDVF**ITN**VNSNSGLKPEVQVPHFWS**Q**QDDI**IK**WRATKQNDCT**  
*Streptococcus pneumoniae* CVX30779.1 KPTG**VGISITN**NDKS**GTFDVF**ISD**VSSPKGVR**TV**QVLP**HS**EV**DQ**QDDI**IK**WRATKQNDCT**  
*Streptococcus suis* ABP90260.1 QPTGTIT**IE**NR**ND**AK**GTFDVF**VR**VNS**SP**KD**IK**QVLP**HS**Q**Q**DDI**IK**WRATKQNDCT**  
*Klebsiella pneumoniae* WP\_181959432.1 .....**VV**AP**NG**L**K**PE**V**Q**V**PH**F**WS**Q**Q**DDI**IK**WRATKQNDCT**

50 60 70 80 90  
*Streptococcus pyogenes* WP\_197035351.1 **YK**VS**V**NT**R**D**HK**HN**R**CE**Y**NI**H**Y**V**ID**NG**KQ**I**GG**GT**K**T**AT**E**...  
*Streptococcus pneumoniae* CVX30779.1 **YK**VT**V**Q**V**AN**H**K**Y**ST**G**IV**N**Y**V**Y**I**Q**ND**SG**I**GG**GT**K**T**AT**E**SE**PK**  
*Streptococcus suis* ABP90260.1 **YK**LT**V**N**K**D**HK**Y**R**T**G**TV**V**Y**V**Y**I**Q**ND**SG**G**IG**GT**K**G**AG**GT**TS**E**AK...  
*Klebsiella pneumoniae* WP\_181959432.1 **Y**RT**I**KA**S**D**H**K**N**ED**G**K**V**Y**V**Y**V**Y**I**Q**ND**KN**K**NY**I**T**E**T**E**TS**R**Q**R**AK...

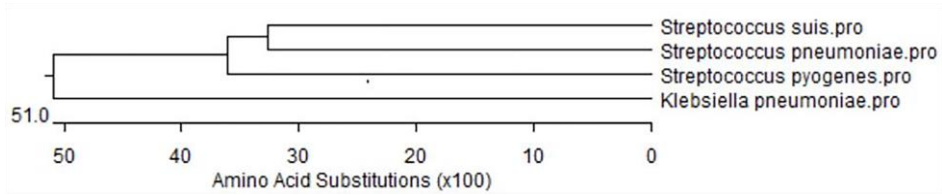

Supplement: S12 Fig — (A) GBS Bsp-like domain protein homology alignment. (B) Analysis of the evolutionary relationship of GBS Bsp-like domains. (PDF) [file ppat.1010765.s012.pdf]
